# Supplementary material
Source: HighWire-hosted journal article supplement (https://err.ersjournals.com/content/32/168/220259)
Supplement: inline-supplementary-material-1 [file inline-supplementary-material-1.pdf]

# **Deep learning for Pneumothorax Diagnosis: A Systematic Review and Meta-Analysis.**

Running title: Review of AI for pneumothorax diagnosis

## **Table of Contents:**

### **Section S1: Supplementary Figures**

Appendix Figure S1: Funnel plots

### **Section S2: Supplementary Table**

Appendix Table S1: PROBAST modification

Appendix Table S2: Database characteristics

Appendix Table S3: Deep learning characteristics

Appendix Table S4: Physicians characteristics

## Section S1: Supplementary Figures

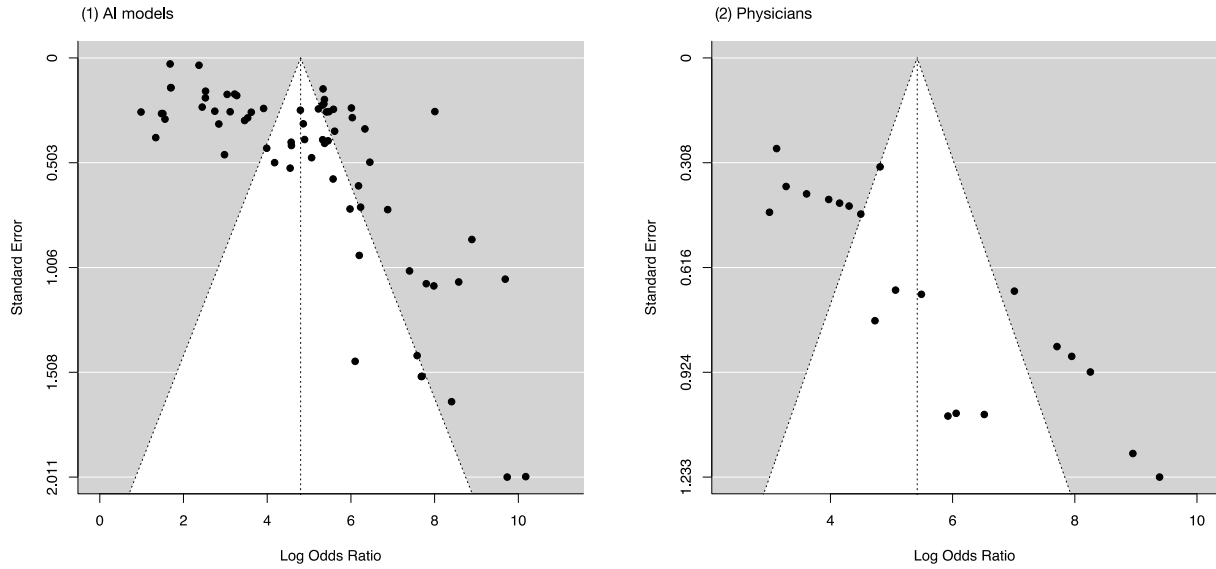

Appendix Figure S1: Funnel plots

These are funnel plots for deep learning models and physicians of odds ratio. Each dot represents a study; the y-axis represents study precision (standard error of effect size) and the x-axis shows the effect size. The outer dashed lines indicate the triangular region within which 95% of studies are expected to lie in the absence of both biases and heterogeneity. The lower left area shows almost no plots for both deep learning models and physicians. These asymmetric distributions indicate that there is a publication bias.

**Section S2: Supplementary Table**

Appendix Table S1: PROBAST modification

---

| PROBAST Items            | Modifications                                              |
|--------------------------|------------------------------------------------------------|
| Domain 1: Participants   | Refer to participant data for image selection when scoring |
| Domain 2: Predictors     | N/A–removed from scoring                                   |
| Domain 3: Outcome        | Items 3.3, 3.5 and 3.6 N/A                                 |
| Domain 4: Analysis Items | Items 4.5, 4.6, and 4.9 N/A                                |
| Domain 5: Overall        | No changes                                                 |

---

Appendix Table S2: Database characteristics

|     | First Author | Year | Inclusion criteria                                                                                                                                                                                                                                                                                                                                        | Exclusion criteria                                                                                                                                                                                                                                                                                                                                                                                                                         | Number of participants                                                       | Number of participants with pneumothorax                                                   | Percentage of female participants                                            | Mean age (SD) years                                                                  | Open source |
|-----|--------------|------|-----------------------------------------------------------------------------------------------------------------------------------------------------------------------------------------------------------------------------------------------------------------------------------------------------------------------------------------------------------|--------------------------------------------------------------------------------------------------------------------------------------------------------------------------------------------------------------------------------------------------------------------------------------------------------------------------------------------------------------------------------------------------------------------------------------------|------------------------------------------------------------------------------|--------------------------------------------------------------------------------------------|------------------------------------------------------------------------------|--------------------------------------------------------------------------------------|-------------|
| [1] | Lee          | 2022 | One radiologist reviewed the hospital database to extract patients who were aged between 18 and 74, underwent posteroanterior chest radiography between January 1st, 2017 and April 30th, 2021, and were tagged with normal, pneumothorax, or consolidation-related abnormalities. Second, radiographs were sampled in a computer-generated random order. | Radiographs were examined to exclude 1) radiographs with artifacts (e.g., central venous catheter, wires from sternotomy or thoracotomy), 2) duplicate radiographs, and 3) radiographs with incorrect patient information in the DICOM files. Third, when the predefined sample size was reached, remaining samples were excluded to prevent unnecessary use of patient data and ensure manageable workloads for participating clinicians. | Development set:1050<br>External test set:500<br>External test set:550       | Development set:NR<br>External test set:100<br>External test set:150                       | Development set:33.1<br>External test set:36.4<br>External test set:30.2     | Development set:48.4(15.4)<br>External test set:48(14)<br>External test set:47(SD16) | No          |
| [2] | Rudolph      | 2022 | Radiology reports from 2010–2018                                                                                                                                                                                                                                                                                                                          | Inconclusive cases, for example, due to projected skin folds that mimic pleural dehiscence, were rejected. Inconclusive cases with a questionable very small trace PTX were included or rejected based on the plausibility by comparing with the medical history and previous CXRs.                                                                                                                                                        | Development set:NR<br>External set(CXR EU):563<br>External set(SCXR PTX):468 | Development set:NR<br>External set(CXR EU):55<br>External set(SCXR PTX):117                | Development set:NR<br>External set(CXR EU):43.3<br>External set(SCXR PTX):NR | Development set:NR<br>External set(CXR EU):49(19)<br>External set(SCXR PTX):NR       | No          |
| [3] | Park         | 2022 | ChestX-ray14                                                                                                                                                                                                                                                                                                                                              | Expert consensus                                                                                                                                                                                                                                                                                                                                                                                                                           | Development set:NR<br>External set:NR                                        | Development set:NR(2379images)<br>External set:NR(120images)                               | Development set:NR<br>External set:NR                                        | Development set:NR<br>External set:NR                                                | Yes         |
| [4] | Shin         | 2022 | Pediatric patients ( $\leq 18$ years old) who underwent chest radiographs from March to May 2021                                                                                                                                                                                                                                                          | lateral and decubitus chest radiographs were excluded                                                                                                                                                                                                                                                                                                                                                                                      | Development set:NR<br>External set:2273                                      | Development set:NR<br>External set:NR(67images)                                            | Development set:NR<br>External set:43.6                                      | Development set:NR<br>External set:7(5.8)                                            | No          |
| [5] | Hallinan     | 2022 | Keyword matching from PACS                                                                                                                                                                                                                                                                                                                                | Expert opinion                                                                                                                                                                                                                                                                                                                                                                                                                             | Development A:30752<br>Development B:30805<br>External set:493               | Development A:NR(2226images)<br>Development B:NR(2637images)<br>External set:NR(125images) | Development A:45.9<br>Development B:46.0<br>External set:44.0                | Development A:46(16)<br>Development B:46(16)<br>External set:53(24)                  | Yes         |

|      |          |          |                                                                                                                                                                                                                                                          |                                                                                                                                                                                                                                                                                                                                                                                                                                                                                                        |                                                                                                                                     |                                                                                                                                                        |                                                                                                                                     |                                                                                                                                             |     |
|------|----------|----------|----------------------------------------------------------------------------------------------------------------------------------------------------------------------------------------------------------------------------------------------------------|--------------------------------------------------------------------------------------------------------------------------------------------------------------------------------------------------------------------------------------------------------------------------------------------------------------------------------------------------------------------------------------------------------------------------------------------------------------------------------------------------------|-------------------------------------------------------------------------------------------------------------------------------------|--------------------------------------------------------------------------------------------------------------------------------------------------------|-------------------------------------------------------------------------------------------------------------------------------------|---------------------------------------------------------------------------------------------------------------------------------------------|-----|
| [6]  | Gips on  | 20<br>22 | All cases from January 2009 to June 2019 where patients who presented after blunt trauma underwent both chest radiograph and CT within 24h of arrival to hospital, where the imaging report for the radiograph was provided before the CT was performed. | Patients with prior imaging at the time of reporting of the chest radiograph were excluded                                                                                                                                                                                                                                                                                                                                                                                                             | Development set:NR<br>External set:1404                                                                                             | Development set:NR<br>External set:NR(171images)                                                                                                       | Development set:NR<br>External set:32.0                                                                                             | Development set:NR<br>External set:Median 52                                                                                                | No  |
| [7]  | Sham rat | 20<br>22 | There is a lot of variation from database to database, and no details on sampling are written.                                                                                                                                                           | NR                                                                                                                                                                                                                                                                                                                                                                                                                                                                                                     | Development set:NR<br>Internal set:NR                                                                                               | Development set:NR<br>Internal set:NR(1600images)                                                                                                      | Development set:NR<br>Internal set:NR                                                                                               | Development set:NR<br>Internal set:NR                                                                                                       | Yes |
| [8]  | Hong     | 20<br>22 | Consecutive cone-beam CT-guided PTNB procedures for lung lesions at Seoul National University Hospital from January 2018 to November 2020.                                                                                                               | (a) patients whose initial follow-up chest radiographs were not obtained within 4 hours, (b) patients in whom PTNB failed, (c) patients who underwent repeat biopsies of a lesion in the same lung within a month, (d) patients with immediate drainage catheter insertion before follow-up chest radiography, (e) patients with pneumothorax on chest radiographs obtained before PTNB, and (f) patients with follow-up chest radiographs without CAD results between February 2020 and November 2020 | Development set:3096<br>External set:665                                                                                            | Development set:NR<br>External set:NR(123images)                                                                                                       | Development set:42.1<br>External set:41.3                                                                                           | Development set:66(12)<br>External set:67(11)                                                                                               | No  |
| [9]  | Jin      | 20<br>22 | Patients who visited respiratory outpatient clinics at three participating institutions in 2018                                                                                                                                                          | The patients who did not undergo chest CT or the procedure $\geq$ 1 month before chest radiography were excluded.                                                                                                                                                                                                                                                                                                                                                                                      | Development set:6006<br>External set (Institution B):2536<br>External set (Institution G):1470<br>External set (Institution K):2000 | Development set:NR<br>External set (Institution B):NR(5images)<br>External set (Institution G):NR(2images)<br>External set (Institution K):NR(8images) | Development set:43.0<br>External set (Institution B):46.0<br>External set (Institution G):44.0<br>External set (Institution K):40.0 | Development set:61(16)<br>External set (Institution B):61(16)<br>External set (Institution G):61(14)<br>External set (Institution K):61(16) | No  |
| [10] | Kim      | 20<br>22 | Keyword matching from PACS                                                                                                                                                                                                                               | NR                                                                                                                                                                                                                                                                                                                                                                                                                                                                                                     | Development set:30805<br>Internal set:NR                                                                                            | Development set:NR(5263images)<br>Internal set:NR(1000images)                                                                                          | Development set:46<br>Internal set:NR                                                                                               | Development set:46(16)<br>Internal set:NR                                                                                                   | No  |
| [11] | Wan g    | 20<br>22 | ChestX-ray14                                                                                                                                                                                                                                             | Expert consensus                                                                                                                                                                                                                                                                                                                                                                                                                                                                                       | Development set:NR<br>Internal set:NR                                                                                               | Development set:NR(2381images)                                                                                                                         | Development set:NR<br>Internal set:NR                                                                                               | Development set:NR<br>Internal set:NR                                                                                                       | Yes |

|      |              |      |                                                                                                                                                                                                                            |                                                                                                                                                                                                                                                                                                                                                       |                                                                                      |                                                                                     |                                                                                 |                                                                                           |  |     |
|------|--------------|------|----------------------------------------------------------------------------------------------------------------------------------------------------------------------------------------------------------------------------|-------------------------------------------------------------------------------------------------------------------------------------------------------------------------------------------------------------------------------------------------------------------------------------------------------------------------------------------------------|--------------------------------------------------------------------------------------|-------------------------------------------------------------------------------------|---------------------------------------------------------------------------------|-------------------------------------------------------------------------------------------|--|-----|
|      |              |      |                                                                                                                                                                                                                            |                                                                                                                                                                                                                                                                                                                                                       |                                                                                      | Internal set:NR(290images)                                                          |                                                                                 |                                                                                           |  |     |
| [12] | Rudolph      | 2022 | Patient presentation at one of the EUs affiliated to our university hospital from 2000 to 2018.                                                                                                                            | Patient's age older than 21, absence of intrathoracic foreign material that might imply the main pathology (eg, the presence of a port catheter might correlate to the presence of suspicious pulmonary nodules or thoracic tubes might correlate to the presence of a PTX), and posterior-anterior (PA) projection in patient's upright positioning. | Development set:NR External set:563                                                  | Development set:NR(11578 images) External set:NR(55images)                          | Development set:NR External set:43.3                                            | Development set:NR External set:49.9(19)                                                  |  | No  |
| [13] | Man galmurti | 2022 | Keyword matching from PACS                                                                                                                                                                                                 | NR                                                                                                                                                                                                                                                                                                                                                    | Development set:30805 Internal set:NR                                                | Development set:NR(1200images) Internal set:NR(300images)                           | Development set:46 Internal set:NR                                              | Development set:46(16) Internal set:NR                                                    |  | Yes |
| [14] | Kakkar       | 2022 | Keyword matching from PACS                                                                                                                                                                                                 | NR                                                                                                                                                                                                                                                                                                                                                    | Development set:30805                                                                | Development set:NR                                                                  | Development set:46                                                              | Development set:46(16)                                                                    |  | Yes |
| [15] | Iqbal        | 2022 | The dataset chosen for our research purpose is a smaller version of the NIH-CXR dataset and contains 5% of the total number of samples, and each pathology is present in the same ratio as is present in the full dataset. | NR                                                                                                                                                                                                                                                                                                                                                    | Development set:NR                                                                   | Development set:NR                                                                  | Development set:NR                                                              | Development set:NR                                                                        |  | Yes |
| [16] | Feng         | 2022 | Retrospectively acquired between January 2010 and April 2020 in Dunedin Hospital.                                                                                                                                          | Frontal chest radiographs (including bedside images) from patients over 16 years of age. Embedded annotations are excluded.                                                                                                                                                                                                                           | Development set:13745 Internal test set:NR External test set:9273                    | Development set:NR(2876images) Internal test set:NR(326images) External test set:NR | Development set:46.8 Internal test set:NR External test set:44.9                | Development set:60(20) Internal test set:NR External test set:47(16.7)                    |  | Yes |
| [17] | Thian        | 2022 | Keyword matching from PACS                                                                                                                                                                                                 | Radiologist uncertain cases                                                                                                                                                                                                                                                                                                                           | Development set(ChestX-ray14):30805 Development set(CheXpert):65240 External set:493 | Development set:NR(14010 images) External set:NR(125images)                         | Development set(ChestX-ray14):46 Development set(CheXpert):40.6 External set:46 | Development set(ChestX-ray14):46(16) Development set(CheXpert):60(17) External set:54(24) |  | No  |

|      |      |          |                                                                                                                                                                                                                                                                                                                                                                                                                                                                                                                                                                        |                                                                                                                                                                   |                                                                                                                                                              |                                                              |                                                                                                                                                          |                                                                                                                                                                  |        |
|------|------|----------|------------------------------------------------------------------------------------------------------------------------------------------------------------------------------------------------------------------------------------------------------------------------------------------------------------------------------------------------------------------------------------------------------------------------------------------------------------------------------------------------------------------------------------------------------------------------|-------------------------------------------------------------------------------------------------------------------------------------------------------------------|--------------------------------------------------------------------------------------------------------------------------------------------------------------|--------------------------------------------------------------|----------------------------------------------------------------------------------------------------------------------------------------------------------|------------------------------------------------------------------------------------------------------------------------------------------------------------------|--------|
| [18] | Lee  | 20<br>22 | The pneumothorax cases were collected from January 2016 to May 2019 in our ED with the following inclusion criteria: (1) at least one chest plain film to confirm pneumothorax, (2) needle decompression (clinically suspicious tension pneumothorax), tube thoracostomy, or catheter thoracostomy due to instability (respiratory rate $\geq$ 24 breaths/min; heart rate, < 60 beats/min or > 120 beats/min; hypotension; room air O2 saturation, < 90%; and patient couldn't speak in whole sentences between breaths), and 3) at least one ECG before intervention. | Minimal pneumothorax (< 20%), bilateral pneumothorax, traumatic hemothorax and pneumothorax, or other indications of tube or catheter thoracostomy were excluded. | Development set:NR<br>Internal set:NR                                                                                                                        | Development set:NR(88images)<br>Internal set:NR(19images)    | Development set:NR<br>Internal set:NR                                                                                                                    | Development set:NR<br>Internal set:NR                                                                                                                            | No     |
| [19] | Tian | 20<br>22 | Montgomery County's Tuberculosis screening program/The chest X-rays are from outpatient clinics and were captured as part of the daily hospital routine within a 1-month period, mostly in September 2012/Frontal-view chest X-ray images, which was obtained between January 1, 2009 to December 31, 2016 from the Second Affiliated Hospital, Zhejiang University School of Medicine /Keyword matching from PACS                                                                                                                                                     | (1) radiographs that were off center or angle; (2) lateral view chest X-ray images; (3) blurred images; and (4) images with more than five catheters.             | Development set(Montgomery):138<br>Development set(Shenzhen):662<br>Development set(SAHZUSM):27955<br>Development set(ChestX-ray14):30805<br>Internal set:NR | Development set(NR(4396images)<br>Internal set:NR(842images) | Development set(Montgomery):53.6<br>Development set(Shenzhen):31.7<br>Development set(SAHZUSM):NR<br>Development set(ChestX-ray14):46<br>Internal set:NR | Development set(Montgomery):40(18)<br>Development set(Shenzhen):35(14)<br>Development set(SAHZUSM):NR<br>Development set(ChestX-ray14):46(16)<br>Internal set:NR | Yes    |
| [20] | Seah | 20<br>21 | Dataset from a large practice in Australia with hundreds of imaging clinics in a wide variety of inpatient, outpatient and critical care settings between 2016 and 2018. Collection timeline: 2004-2019.                                                                                                                                                                                                                                                                                                                                                               | NR                                                                                                                                                                | Development set:2286<br>External set:NR                                                                                                                      | Development set:NR<br>External set:NR(211images)             | Development set:NR<br>External set:NR                                                                                                                    | Development set:NR<br>External set:NR                                                                                                                            | No,Yes |
| [21] | Kuo  | 20<br>21 | Keyword matching from PACS                                                                                                                                                                                                                                                                                                                                                                                                                                                                                                                                             | NR                                                                                                                                                                | Development set:NR<br>Internal set:NR<br>External set:NR                                                                                                     | Development set:NR<br>Internal set:NR<br>External set:NR     | Development set:NR<br>Internal set:NR<br>External set:NR                                                                                                 | Development set:NR<br>Internal set:NR<br>External set:NR                                                                                                         | Yes    |
| [22] | Hong | 20<br>21 | Files provided after de-identification by Soonchunhyang University Hospital.                                                                                                                                                                                                                                                                                                                                                                                                                                                                                           | NR                                                                                                                                                                | Development set:NR<br>Internal set:NR                                                                                                                        | Development set:NR(12493images)                              | Development set:NR<br>Internal set:NR                                                                                                                    | Development set:NR<br>Internal set:NR                                                                                                                            | No     |

|      |         |          |                                                                                                                                                                                                                                                                                                                                                                                                                                                                                                             |                                                                                                                                                                  |                                                          |                                                                                             |                                                          |                                                          |  |         |
|------|---------|----------|-------------------------------------------------------------------------------------------------------------------------------------------------------------------------------------------------------------------------------------------------------------------------------------------------------------------------------------------------------------------------------------------------------------------------------------------------------------------------------------------------------------|------------------------------------------------------------------------------------------------------------------------------------------------------------------|----------------------------------------------------------|---------------------------------------------------------------------------------------------|----------------------------------------------------------|----------------------------------------------------------|--|---------|
|      |         |          |                                                                                                                                                                                                                                                                                                                                                                                                                                                                                                             |                                                                                                                                                                  |                                                          | Internal set:NR(1000 images)                                                                |                                                          |                                                          |  |         |
| [23] | Rueckel | 20<br>21 | Patients were retrospectively identified by data research on radiology reports from 2010 to 2018 to separately identify PTX-positive/negative images, consequently clinically non-consecutive cohort with a targeted PTX overall prevalence of approx. 25% in our institutional Picture Archiving and Communication System (PACS). Data was directly extracted from clinical routine without applying any quality-related exclusion criteria; therefore, data also includes examinations of limited quality | without applying any quality-related exclusion criteria;                                                                                                         | Development set:NR<br>Internal set:4360                  | Development set:NR(3993 images)<br>Internal set:NR(760 images)                              | Development set:NR<br>Internal set:NR                    | Development set:NR<br>Internal set:NR                    |  | No      |
| [24] | Cho     | 20<br>21 | NR                                                                                                                                                                                                                                                                                                                                                                                                                                                                                                          | NR                                                                                                                                                               | Development set:NR<br>Internal set:NR<br>External set:NR | Development set:NR(266 images)<br>Internal set:NR(65 images)<br>External set:NR(188 images) | Development set:NR<br>Internal set:NR<br>External set:NR | Development set:NR<br>Internal set:NR<br>External set:NR |  | No      |
| [25] | Niehus  | 20<br>21 | NLP (cardiac congestion, pleural effusion, air-space opacification, pneumothorax, central venous catheter, thoracic drain, gastric tube, and tracheal tube/cannula) extraction from patients examined between January 1, 2009, and March 31, 2019.                                                                                                                                                                                                                                                          | NR                                                                                                                                                               | Development set:18361<br>External set:65240              | Development set:NR(1342 images)<br>Internal set:NR(62 images)<br>External set:NR            | Development set:38.4<br>External set:40.6                | Development set:62.6(16)<br>External set:60(17)          |  | No, Yes |
| [26] | Kao     | 20<br>21 | A retrospective search of the Picture Archiving and Communication System (PACS) and the MRAS for chest radiographs with pneumothorax alerts from 1 January 2015 to 31 December 2019, and another retrospective search of the PACS and the Radiology Information System (RIS) for chest radiographs with "pneumothorax" in the reports from 1 January 2013                                                                                                                                                   | Negative pneumothorax, age less than or equal to 6 years, poor positioning, poor image quality, metallic implants masking lung fields, and chest wall deformity. | Development set:NR<br>External set:NR                    | Development set:NR(1235 images)<br>External set:NR(86 images)                               | Development set:NR<br>External set:NR                    | Development set:NR<br>External set:NR                    |  | No      |



|      |          |      |                                                                                                                                                                                                                                                         |                                                                                                                                                                                                                       |                                                                                                              |                                                                                                                                              |                                                                                                          |                                                                                                                    |        |
|------|----------|------|---------------------------------------------------------------------------------------------------------------------------------------------------------------------------------------------------------------------------------------------------------|-----------------------------------------------------------------------------------------------------------------------------------------------------------------------------------------------------------------------|--------------------------------------------------------------------------------------------------------------|----------------------------------------------------------------------------------------------------------------------------------------------|----------------------------------------------------------------------------------------------------------|--------------------------------------------------------------------------------------------------------------------|--------|
|      |          |      | to 31 December 2014 (before the MRAS went online) were performed /A retrospective search of the PACS and RIS for chest radio- graphs for health examination with negative findings in 2019 was performed and 337 chest radiographs were identified.     |                                                                                                                                                                                                                       |                                                                                                              |                                                                                                                                              |                                                                                                          |                                                                                                                    |        |
| [27] | Mosquera | 2021 | Radiological reports records of CXRs performed between 2008 and 2019 at a 650-bed university hospital. Inclusion criteria for CXR images were having a concluding report and belonging to a patient whose images were not used in any training dataset. | We excluded images with a confirmed "Support Devices" label,                                                                                                                                                          | Development set:NR<br>External set:30805<br>External set:NR                                                  | Development set:NR(2379images)<br>External set:NR(238images)<br>External set:NR(119images)                                                   | Development set:NR<br>External set:46<br>External set:NR                                                 | Development set:NR<br>External set:46(16)<br>External set:NR                                                       | Yes,No |
| [28] | Wang     | 2021 | The dataset was exported from the hospital through a keyword search in the data format of DICOM.                                                                                                                                                        | Independent and multi-blind screening mechanism by multiple physicians to guarantee that a certain image can only be enrolled as a pneumothorax sample if it was annotated by multiple physicians to be pneumothorax. | Development set:NR<br>External set:NR                                                                        | Development set:NR(7105images)<br>External set:NR(108images)                                                                                 | Development set:NR<br>External set:NR                                                                    | Development set:NR<br>External set:NR                                                                              | Yes    |
| [29] | Nam      | 2021 | Chest radiographs taken between March 2004 and December 2017 were retrospectively collected from Seoul National University Hospital                                                                                                                     | NR                                                                                                                                                                                                                    | Development set:108053<br>Internal set:190<br>External set(ER in SNUH ):202<br>External set(PadChest ):67000 | Development set:NR(7638images)<br>Internal set:NR(23images)<br>External set(ER in SNUH ):NR(2images)<br>External set(PadChest ):NR(11images) | Development set:48.7<br>Internal set:46.8<br>External set(ER in SNUH ):53<br>External set(PadChest):49.7 | Development set:56(14)<br>Internal set:59(14)<br>External set(ER in SNUH ):57(17)<br>External set(PadChest):58(20) | Yes,No |

|      |      |          |                                                                                                                                                                                                                                                                                                                                                                                                                                                                                                                                                                                                                                                                                                                                                                                                                                                                                                                                             |                                                                                                                                                                                                                                                                   |                                                                                                                                                     |                                                                                                                                          |                                                                                                                                                      |                                                                                                                                                             |         |
|------|------|----------|---------------------------------------------------------------------------------------------------------------------------------------------------------------------------------------------------------------------------------------------------------------------------------------------------------------------------------------------------------------------------------------------------------------------------------------------------------------------------------------------------------------------------------------------------------------------------------------------------------------------------------------------------------------------------------------------------------------------------------------------------------------------------------------------------------------------------------------------------------------------------------------------------------------------------------------------|-------------------------------------------------------------------------------------------------------------------------------------------------------------------------------------------------------------------------------------------------------------------|-----------------------------------------------------------------------------------------------------------------------------------------------------|------------------------------------------------------------------------------------------------------------------------------------------|------------------------------------------------------------------------------------------------------------------------------------------------------|-------------------------------------------------------------------------------------------------------------------------------------------------------------|---------|
| [30] | Choi | 20<br>21 | <p>Normal: Patients who visited a health screening center or oncology outpatient clinic and underwent both chest radiograph and chest CT within one month between May 2017 and July 2017 or between January 2019 and March 2019.</p> <p>Nodule: Patients who underwent both chest radiograph and chest CT within one month and underwent CT guided biopsy for lung nodules between January 2015 and March 2015 or between January 2019 and March 2019.</p> <p>Consolidation: Patients who visited an emergency department or respiratory medicine and underwent both chest radiograph and chest CT within one month between December 2014 and June 2015 or between October 2018 and March 2019.</p> <p>Pneumothorax: Patients who visited a thoracic surgery and underwent both chest radiograph and chest CT within one month between December 2015 and September 2017.</p> <p>All CRs were collected from patients over 19 years old.</p> | <p>Normal: Abnormal findings</p> <p>Nodule: Concurrent other abnormal findings, Not visible on CR, Multiple lesions</p> <p>Consolidation: Concurrent other abnormal findings</p> <p>Pneumothorax: Concurrent other abnormal findings, Chest draining catheter</p> | <p>Development set:NR</p> <p>External set:244</p>                                                                                                   | <p>Development set:NR</p> <p>External set:NR(35images)</p>                                                                               | <p>Development set:NR</p> <p>External set:61</p>                                                                                                     | <p>Development set:NR</p> <p>External set:52(18)</p>                                                                                                        | No      |
| [31] | Lyu  | 20<br>21 | <p>Patients who visited the emergency department at Jinling Hospital with trauma and underwent chest CT from September 2019 and November 2019</p>                                                                                                                                                                                                                                                                                                                                                                                                                                                                                                                                                                                                                                                                                                                                                                                           | Poor image quality                                                                                                                                                                                                                                                | <p>Development set:NR</p> <p>External set:403</p>                                                                                                   | <p>Development set:NR</p> <p>External set:NR(29images)</p>                                                                               | <p>Development set:NR</p> <p>External set:37</p>                                                                                                     | <p>Development set:NR</p> <p>External set:50(19)</p>                                                                                                        | No      |
| [32] | Kim  | 20<br>21 | <p>Consecutive subjects who visited the health screening center underwent CXR and chest CT in 2018 were retrospectively investigated from the radiology database and medical records system.</p>                                                                                                                                                                                                                                                                                                                                                                                                                                                                                                                                                                                                                                                                                                                                            | <p>Subjects who underwent chest CT from CXR with intervals of 1 month or more were excluded.</p>                                                                                                                                                                  | <p>Development set:5887</p> <p>External set(Institution B):1694</p> <p>External set(Institution G):1858</p> <p>External set(Institution K):2335</p> | <p>Development set:NR</p> <p>External set(Institution B):0</p> <p>External set(Institution G):0</p> <p>External set(Institution K):1</p> | <p>Development set:26.5</p> <p>External set(Institution B):41.2:</p> <p>External set(Institution G):21.5</p> <p>External set(Institution K):19.7</p> | <p>Development set:54(11)</p> <p>External set(Institution B):56(11)</p> <p>External set(Institution G):53(11)</p> <p>External set(Institution K):54(13)</p> | No      |
| [33] | Li   | 20<br>21 | <p>CXRs were collected retrospectively from adult patients between June 2013 and July 2019.</p>                                                                                                                                                                                                                                                                                                                                                                                                                                                                                                                                                                                                                                                                                                                                                                                                                                             | NR                                                                                                                                                                                                                                                                | <p>Development set:3526</p> <p>External set:562</p>                                                                                                 | <p>Development set:NR</p> <p>Internal set:NR</p>                                                                                         | <p>Development set:NR</p> <p>Internal set:NR</p> <p>External set:NR</p>                                                                              | <p>Development set:NR</p> <p>Internal set:NR</p> <p>External set:NR</p>                                                                                     | No, Yes |

|      |              |          |                                                                                                                                                                                                                                                                                                                                                                      |                  |     |                                                                                                                                                                                                                                                                        |                                                                                                                                                                                                                                 |                                                                                                                                                                                                                                                            |                                                                                                                                                                                                                                                                                |        |
|------|--------------|----------|----------------------------------------------------------------------------------------------------------------------------------------------------------------------------------------------------------------------------------------------------------------------------------------------------------------------------------------------------------------------|------------------|-----|------------------------------------------------------------------------------------------------------------------------------------------------------------------------------------------------------------------------------------------------------------------------|---------------------------------------------------------------------------------------------------------------------------------------------------------------------------------------------------------------------------------|------------------------------------------------------------------------------------------------------------------------------------------------------------------------------------------------------------------------------------------------------------|--------------------------------------------------------------------------------------------------------------------------------------------------------------------------------------------------------------------------------------------------------------------------------|--------|
|      |              |          |                                                                                                                                                                                                                                                                                                                                                                      |                  |     | External set:NR                                                                                                                                                                                                                                                        |                                                                                                                                                                                                                                 |                                                                                                                                                                                                                                                            |                                                                                                                                                                                                                                                                                |        |
| [34] | Thian        | 20<br>21 | Retrospectively collected a random selection of pneumothorax-positive cases and pneumothorax-negative controls obtained in their respective emergency departments over a 4-year time period from 2016 to 2019, with a ratio of between one to four controls to each case of pneumothorax being used                                                                  | NR               |     | Development set(ChestX-ray14):27967<br>Development set(CheXpert):45766<br>External set(Hospital A):511<br>External set(Hospital B):519<br>External set(Hospital C):321<br>External set(Hospital D):525<br>External set(Hospital E):517<br>External set(Hospital F):538 | Development set:NR(10928 images)<br>External set(Hospital A):200<br>External set(Hospital B):136<br>External set(Hospital C):41<br>External set(Hospital D):125<br>External set(Hospital E):117<br>External set(Hospital F):138 | Development set(ChestX-ray14):NR<br>Development set(CheXpert):NR<br>External set(Hospital A):25<br>External set(Hospital B):37<br>External set(Hospital C):46<br>External set(Hospital D):46<br>External set(Hospital E):27<br>External set(Hospital F):NR | Development set(ChestX-ray14):NR<br>Development set(CheXpert):NR<br>External set(Hospital A):57(23)<br>External set(Hospital B):52(22)<br>External set(Hospital C):70(20)<br>External set(Hospital D):53(24)<br>External set(Hospital E):52(21)<br>External set(Hospital F):NR | Yes,No |
| [35] | Abed<br>alla | 20<br>21 | ChestX-ray14                                                                                                                                                                                                                                                                                                                                                         | Expert consensus |     | Development set:NR                                                                                                                                                                                                                                                     | Development set:NR(2669 images)                                                                                                                                                                                                 | Development set:NR                                                                                                                                                                                                                                         | Development set:NR                                                                                                                                                                                                                                                             | Yes    |
| [36] | Sung         | 20<br>21 | Posteroanterior chest radiographs obtained in adult patients (both inpatients and outpatients) between January 2016 and December 2017 at Asan Medical Center were retrieved. Examinations including the various types of findings (normal, abnormal [five types of abnormal findings]) were consecutively collected until the numbers defined earlier were achieved. | NR               | 228 |                                                                                                                                                                                                                                                                        | Development set:NR<br>External set:NR(11 images)                                                                                                                                                                                | GroupA:37,GroupB:47                                                                                                                                                                                                                                        | GroupA:54(14),GroupB:57(14)                                                                                                                                                                                                                                                    | No     |
| [37] | Drael<br>os  | 20<br>21 | Chest CT volumes obtained without intravenous contrast material and their associated reports from Duke University Health System spans January 2012 – April 2017                                                                                                                                                                                                      |                  |     | Development set:NR<br>Internal set:NR                                                                                                                                                                                                                                  | Development set:NR<br>Internal set:NR                                                                                                                                                                                           | Development set:NR<br>Internal set:NR                                                                                                                                                                                                                      | Development set:NR<br>Internal set:NR                                                                                                                                                                                                                                          | No     |
| [38] | Wan<br>g     | 20<br>21 | Keyword matching from PACS                                                                                                                                                                                                                                                                                                                                           | NR               |     | Development set:30805<br>Internal set:30805                                                                                                                                                                                                                            | Development set:NR(2637 images)<br>Internal set:NR(2661 images)                                                                                                                                                                 | Development set:NR<br>Internal set:NR                                                                                                                                                                                                                      | Development set:NR<br>Internal set:NR                                                                                                                                                                                                                                          | Yes    |

|      |          |          |                                                                                                                                                                                                                                                                                                                    |                                                                                                                                                                                                                                                                                     |                                                                                                                                                                 |                                                                                                                                                           |                                                                                                                                                                |                                                                                                                                                                              |        |
|------|----------|----------|--------------------------------------------------------------------------------------------------------------------------------------------------------------------------------------------------------------------------------------------------------------------------------------------------------------------|-------------------------------------------------------------------------------------------------------------------------------------------------------------------------------------------------------------------------------------------------------------------------------------|-----------------------------------------------------------------------------------------------------------------------------------------------------------------|-----------------------------------------------------------------------------------------------------------------------------------------------------------|----------------------------------------------------------------------------------------------------------------------------------------------------------------|------------------------------------------------------------------------------------------------------------------------------------------------------------------------------|--------|
| [39] | Rueckel  | 20<br>20 | Chest radiographs were retrospectively identified by data research (search criteria based on radiology reports from 2010–2018) in our institutional Picture Archiving and Communication System (PACS).                                                                                                             | Inconclusive cases, for example, due to projected skin folds that mimic pleural dehiscence, were rejected. Inconclusive cases with a questionable very small trace PTX were included or rejected based on the plausibility by comparing with the medical history and previous CXRs. | Development set:NR<br>External set:4688                                                                                                                         | Development set:NR<br>External set:1173                                                                                                                   | Development set:NR<br>External set(Positive):44.7<br>External set(Negative):40.3                                                                               | Development set:NR<br>External set(Positive):56(21)<br>External set(Negative):64(19)                                                                                         | Yes,No |
| [40] | Chen     | 20<br>20 | Radiographs in children and adolescents 1–17 years in age that admitted the Department of Pediatrics, Kaohsiung Chang Gung Memorial Hospital from January 1, 2018 to December 31, 2019 for acute lower airway infections, pneumothorax, or other non-respiratory disease with a normal chest X-ray were recruited. | NR                                                                                                                                                                                                                                                                                  | Development set:NR<br>Internal set:NR                                                                                                                           | Development set:NR(172images)<br>Internal set:NR(42images)                                                                                                | Development set:NR<br>Internal set:NR                                                                                                                          | Development set:NR<br>Internal set:NR                                                                                                                                        | No     |
| [41] | Röhricht | 20<br>20 | We collected all chest CT scans from the clinical routine over a timeframe of 2.5 years from 2013 to 2015 and generated labels for 'pneumothorax' and 'no pneumothorax' based on the radiological reports and visual verification by a radiologist with three years of subspecialty training in thoracic radiology | NR                                                                                                                                                                                                                                                                                  | 610                                                                                                                                                             | Development set:NR(34images)<br>Internal set:NR(167images)                                                                                                | 37                                                                                                                                                             | 54(19)                                                                                                                                                                       | No     |
| [42] | Wang     | 20<br>20 | ChestX-ray14                                                                                                                                                                                                                                                                                                       | Expert consensus                                                                                                                                                                                                                                                                    | Development set:NR                                                                                                                                              | Development set:NR(2379images)                                                                                                                            | Development set:NR                                                                                                                                             | Development set:NR                                                                                                                                                           | Yes    |
| [43] | Yi       | 20<br>20 | Keyword matching from PACS                                                                                                                                                                                                                                                                                         | NR                                                                                                                                                                                                                                                                                  | Development set:30805<br>External set:NR                                                                                                                        | Development set:NR<br>External set:NR(176images)                                                                                                          | Development set:46<br>External set:NR                                                                                                                          | Development set:46(16)<br>External set:NR                                                                                                                                    | Yes    |
| [44] | Hwang    | 20<br>20 | Patients underwent PTNB between Jan 2017 and Dec 2017/Patients underwent PTNB between Jan 2013 and Dec 2014/Patients underwent PTNB between Mar 2013 and Dec 2016/January and February 2017 from Institution A                                                                                                     | No available post-PTNB CR, Immediate drainage catheter insertion before CR/                                                                                                                                                                                                         | Development set:1757<br>External set(Institution A):1055<br>External set(Institution B):388<br>External set(Institution C):314<br>External set(Reader Test):170 | Development set:NR<br>External set(Institution A):208<br>External set(Institution B):67<br>External set(Institution C):33<br>External set(Reader Test):44 | Development set:40<br>External set(Institution A):40.3<br>External set(Institution B):43.3<br>External set(Institution C):34.7<br>External set(Reader Test):38 | Development set:65(12)<br>External set(Institution A):65(11)<br>External set(Institution B):65(12)<br>External set(Institution C):65(13)<br>External set(Reader Test):63(12) | No     |

|      |           |          |                                                                                                                                                                                                                                                                                                                                                                                            |    |                                        |                                                                                                                |                                       |                                                                                                                                    |        |
|------|-----------|----------|--------------------------------------------------------------------------------------------------------------------------------------------------------------------------------------------------------------------------------------------------------------------------------------------------------------------------------------------------------------------------------------------|----|----------------------------------------|----------------------------------------------------------------------------------------------------------------|---------------------------------------|------------------------------------------------------------------------------------------------------------------------------------|--------|
| [45] | Kita mura | 20<br>20 | Our data for this study was collected from the Vendor Neutral Archive across the years 2013 to 2017. Positive and negative cases were collected concurrently with the same sex and age distribution by searching radiology reports for the term "pneumothorax." There was no patient overlap between the two datasets, and only 1 chest X-ray study was obtained from each unique patient. | NR | Development set:NR                     | Development set:NR(207images)                                                                                  | Development set:NR                    | Development set:NR                                                                                                                 | No     |
| [46] | Park      | 20<br>20 | We retrospectively collected and anonymized 15,809 chest radiographs from two institutions (Asan Medical Center (institution A) and Seoul National University Bundang Hospital (institution B)).                                                                                                                                                                                           | NR | Institution A:100<br>Institution B:100 | Institution A:NR<br>Institution B:NR                                                                           | Institution A:37<br>Institution B:35  | Institution A(Positive):56(18)<br>Institution A(Negative):48(8)<br>Institution B(Positive):62(15)<br>Institution B(Negative):49(7) | No     |
| [47] | Wang      | 20<br>20 | Keyword matching from PACS                                                                                                                                                                                                                                                                                                                                                                 | NR | 30805                                  | Development set:NR<br>Internal set:NR(2661images)                                                              | 46                                    | 46(16)                                                                                                                             | Yes    |
| [48] | Elkins    | 20<br>20 | Keyword matching from PACS                                                                                                                                                                                                                                                                                                                                                                 | NR | 30805                                  | NR                                                                                                             | 46                                    | 46(16)                                                                                                                             | Yes    |
| [49] | Lai       | 20<br>20 | Keyword matching from PACS                                                                                                                                                                                                                                                                                                                                                                 | NR | Development set:NR<br>External set:NR  | Development set:NR(1028images)<br>External set:NR(115images)                                                   | Development set:NR<br>External set:NR | Development set:NR<br>External set:NR                                                                                              | Yes,No |
| [50] | Majkowska | 20<br>20 | This data set consists of all consecutive inpatient and outpatient images in DICOM format obtained from five regional centers across a large hospital group in India (Bangalore, Bhubaneswar, Chennai, Hyderabad, and New Delhi) between November 2010 and January 2018. /Keyword matching from PACS                                                                                       | NR | DS1:538390<br>ChestX-ray14:30805       | Development set:NR(2609images)<br>Internal set(DS1):NR(88images)<br>Internal set(Chest X-Ray14 ):NR(195images) | DS1:38.2<br>ChestX-ray14:46           | DS1:Median 50<br>ChestX-ray14:46(16)                                                                                               | No,Yes |
| [51] | Li        | 20<br>19 | We identified chest CT cases of patients, using a free text search in a radiology report repository with keywords ("pneumothorax" and "chest CT") and subsequent consensus of two expert thoracic radiologists.                                                                                                                                                                            | NR | 280                                    | Development set:NR(50images)<br>Internal set:NR(160images)                                                     | 30.7                                  | 56(22)                                                                                                                             | No     |

|      |       |          |                                                                                                                                                                                                                                                                                                                                                                                                                                                                                                                                                                                          |                                                                                                                                                                                                                                                                                                                                                                                                                                                                        |                                                                                                                                                                                                                  |                                                                                                                                                                                                            |                                                                                                                                                                                                                    |                                                                                                                                                                                                                                                         |     |
|------|-------|----------|------------------------------------------------------------------------------------------------------------------------------------------------------------------------------------------------------------------------------------------------------------------------------------------------------------------------------------------------------------------------------------------------------------------------------------------------------------------------------------------------------------------------------------------------------------------------------------------|------------------------------------------------------------------------------------------------------------------------------------------------------------------------------------------------------------------------------------------------------------------------------------------------------------------------------------------------------------------------------------------------------------------------------------------------------------------------|------------------------------------------------------------------------------------------------------------------------------------------------------------------------------------------------------------------|------------------------------------------------------------------------------------------------------------------------------------------------------------------------------------------------------------|--------------------------------------------------------------------------------------------------------------------------------------------------------------------------------------------------------------------|---------------------------------------------------------------------------------------------------------------------------------------------------------------------------------------------------------------------------------------------------------|-----|
| [52] | Park  | 20<br>19 | <p>Cases from two tertiary referral hospitals were collected from a picture archiving and communication system. Diagnoses were searched using the radiologic reports and diagnosis codes in the electronic medical records.</p> <p>/1d follow-up cases with chest radiographs after PTNB in our hospital between January 2016 and December 2016./3h follow-up cases with chest radiographs after PTNB in our hospital between January 2016 and December 2016.</p>                                                                                                                        | NR                                                                                                                                                                                                                                                                                                                                                                                                                                                                     | <p>Development set:NR(1343images)</p> <p>Internal set:NR(253images)</p> <p>Development set:NR(3-Internal set(Temporal h):NR(247images)</p> <p>Internal set(Temporal 1-d):NR(309images)</p>                       | Development set:NR(1343images) <p>Internal set:NR(253images)</p> <p>Development set:NR(3-Internal set(Temporal h):NR(247images)</p> <p>Internal set(Temporal 1-d):NR(309images)</p>                        | Development set:NR(1343images) <p>Internal set:NR(253images)</p> <p>Development set:NR(3-Internal set(Temporal h):NR(247images)</p> <p>Internal set(Temporal 1-d):NR(309images)</p>                                | Development set:NR(1343images) <p>Internal set:NR(253images)</p> <p>Development set:NR(3-Internal set(Temporal h):NR(247images)</p> <p>Internal set(Temporal 1-d):NR(309images)</p>                                                                     | No  |
| [53] | Liang | 20<br>19 | <p>This database were collected from 13 medical centers in Japan and one institution in the United States under the following conditions: only one nodule on an image for nodule cases; confirmation of presence or absence of a lung nodule by CT examination; and nodule classification as malignant based on histologic and cytologic examination or as benign based on histology, definitive isolation of a pathogenic organism, shrinkage and disappearance with the use of antibiotics, or no change observed during a follow-up period of 2 years./Keyword matching from PACS</p> | NR                                                                                                                                                                                                                                                                                                                                                                                                                                                                     | <p>Development set(JSRT):248</p> <p>Development set(ChestX-ray14):30805</p> <p>Internal set:30805</p>                                                                                                            | <p>Development set:NR(2637images)</p> <p>Internal set:NR(2661images)</p>                                                                                                                                   | <p>Development set(JSRT):51.6</p> <p>Development set(ChestX-ray14):46</p> <p>Internal set:46</p>                                                                                                                   | <p>Development set(JSRT):58(13)</p> <p>Development set(ChestX-ray14):46(16)</p> <p>Internal set:46(16)</p>                                                                                                                                              | Yes |
| [54] | Hwang | 20<br>19 | <p>Normal CRs: CRs from patients with no referable abnormality on chest CT. CRs taken within 2 weeks from the chest CT. CRs taken between September and October 2017.</p> <p>Pulmonary malignancies: CRs from patients with pathologically or clinically diagnosed pulmonary malignancies. CRs with corresponding chest CT taken within 1 month. CRs taken between December 2016 and October 2017.</p> <p>Active pulmonary tuberculosis: CRs from</p>                                                                                                                                    | <p>Pulmonary malignancies: CRs without visible lesions. CRs with &gt;3 lesions. CRs with other clinically relevant abnormalities.</p> <p>Active pulmonary tuberculosis: CRs without visible abnormality. CRs with other clinically relevant abnormalities</p> <p>Pneumonia: CRs without visible abnormality. CRs with other clinically relevant abnormalities</p> <p>Pneumothorax: CRs with drainage catheter or subcutaneous emphysema. CRs with other clinically</p> | <p>Development set:62019</p> <p>Internal set:200</p> <p>External set(Institution B):245</p> <p>External set(Institution C):190</p> <p>External set(Institution D):184</p> <p>External set(Institution E):196</p> | <p>Development set:2670</p> <p>Internal set:24</p> <p>External set(Institution B):30</p> <p>External set(Institution C):25</p> <p>External set(Institution D):20</p> <p>External set(Institution E):20</p> | <p>Development set:67</p> <p>Internal set:43.5</p> <p>External set(Institution B):35.5</p> <p>External set(Institution C):42.1</p> <p>External set(Institution D):47.3</p> <p>External set(Institution E):23.5</p> | <p>Development set:Normal:51(16),Abnormal:62(15)</p> <p>Internal set:54(15)</p> <p>External set(Institution B):55(17)</p> <p>External set(Institution C):51(19)</p> <p>External set(Institution D):49(18)</p> <p>External set(Institution E):56(16)</p> | No  |

|      |           |          |                                                                                                                                                                                                                                                                                                                                                                                                                                                                                                                                                                                                                                                                                                                                                                                                                                                                                                                                                                                                                                                                                                                                                                                                                                                          |                                                                      |                                          |                                                                                                |                                       |                                           |         |  |  |  |
|------|-----------|----------|----------------------------------------------------------------------------------------------------------------------------------------------------------------------------------------------------------------------------------------------------------------------------------------------------------------------------------------------------------------------------------------------------------------------------------------------------------------------------------------------------------------------------------------------------------------------------------------------------------------------------------------------------------------------------------------------------------------------------------------------------------------------------------------------------------------------------------------------------------------------------------------------------------------------------------------------------------------------------------------------------------------------------------------------------------------------------------------------------------------------------------------------------------------------------------------------------------------------------------------------------------|----------------------------------------------------------------------|------------------------------------------|------------------------------------------------------------------------------------------------|---------------------------------------|-------------------------------------------|---------|--|--|--|
|      |           |          | patients with active pulmonary tuberculosis diagnosed via culture or PCR. CRs taken within 2 weeks from the date of initial treatment. CRs with corresponding chest CT taken within 1 month. CRs taken between March 2017 and September 2017<br>Pneumonia: CRs from patients with microbiologically or clinically diagnosed pneumonia. CRs taken within 1 week from the date of diagnosis. CRs with corresponding chest CT taken within 1 week. CRs taken between March 2016 and September 2017<br>Pneumothorax: CRs with an unequivocal finding of pneumothorax. CRs taken between April 2016 and August 2017<br><br>Candidate chest X-rays of adult patients were obtained from 1 January 2006 to 31 December 2016. Candidate images for inclusion in the positive group were identified by using the search terms "small pneumothorax," "trace pneumothorax," "moderate pneumothorax," and "large pneumothorax" with mPower's standard filters in place to minimize negative occurrences. Candidate images for inclusion in the negative group were identified both by searching for negative phrases such as "no pneumothorax" and by including X-rays from the same time period that did not meet the criteria for inclusion in the positive group. | relevant abnormalities. CRs taken immediately after thoracic surgery |                                          |                                                                                                |                                       |                                           |         |  |  |  |
| [55] | Taylor    | 20<br>18 |                                                                                                                                                                                                                                                                                                                                                                                                                                                                                                                                                                                                                                                                                                                                                                                                                                                                                                                                                                                                                                                                                                                                                                                                                                                          | NR                                                                   | Development set:NR<br>External set:30805 | Development set:NR(2670 images)<br>Internal set:NR(148 images)<br>External set:NR(5302 images) | Development set:NR<br>External set:46 | Development set:NR<br>External set:46(16) | No, Yes |  |  |  |
| [56] | Rajpurkar | 20<br>18 | Keyword matching from PACS                                                                                                                                                                                                                                                                                                                                                                                                                                                                                                                                                                                                                                                                                                                                                                                                                                                                                                                                                                                                                                                                                                                                                                                                                               | NR                                                                   | 30805                                    | Development set:NR(4597 images)<br>Internal set:NR(45 images)                                  | 46                                    | 46 (16)                                   | Yes     |  |  |  |

|      |            |          |                                                                                                                                                                                                                                                                                                                                                                                                                                                                                                                                                                                                                                      |                                |                                                                                                                                                                                              |                                                                                                                                                                                |                                                                                                                                                                                      |                                                                                                                                                                                                    |     |
|------|------------|----------|--------------------------------------------------------------------------------------------------------------------------------------------------------------------------------------------------------------------------------------------------------------------------------------------------------------------------------------------------------------------------------------------------------------------------------------------------------------------------------------------------------------------------------------------------------------------------------------------------------------------------------------|--------------------------------|----------------------------------------------------------------------------------------------------------------------------------------------------------------------------------------------|--------------------------------------------------------------------------------------------------------------------------------------------------------------------------------|--------------------------------------------------------------------------------------------------------------------------------------------------------------------------------------|----------------------------------------------------------------------------------------------------------------------------------------------------------------------------------------------------|-----|
| [57] | Cicer<br>o | 20<br>17 | Two-view chest radiographic examinations performed between January 1, 2005, and December 31, 2015, on patients at least 18 years of age.                                                                                                                                                                                                                                                                                                                                                                                                                                                                                             | The AP and lateral projections | NR                                                                                                                                                                                           | Development set:NR(1132images)<br>Internal set:NR(167images)                                                                                                                   | 44                                                                                                                                                                                   | 56(NR)                                                                                                                                                                                             | No  |
| [58] | Chen       | 20<br>19 | Keyword matching from PACS                                                                                                                                                                                                                                                                                                                                                                                                                                                                                                                                                                                                           | NR                             | 30805                                                                                                                                                                                        | Development set:NR<br>Internal set:NR                                                                                                                                          | 46                                                                                                                                                                                   | 46 (16)                                                                                                                                                                                            | Yes |
| [59] | Zhou       | 20<br>21 | This database were collected from 13 medical centers in Japan and one institution in the United States under the following conditions: only one nodule on an image for nodule cases; confirmation of presence or absence of a lung nodule by CT examination; and nodule classification as malignant based on histologic and cytologic examination or as benign based on histology, definitive isolation of a pathogenic organism, shrinkage and disappearance with the use of antibiotics, or no change observed during a follow-up period of 2 years./Montgomery County's Tuberculosis screening program/Keyword matching from PACS | NR                             | Development set(JSRT):248<br>Development set(Montgomery):138<br>Development set(MIMIC):63478<br>Development set(ChestX-ray14):30805<br>Development set(CheXpert):65240<br>Internal set:30805 | Development set(JSRT):NR<br>Development set(Montgomery):NR<br>Development set(MIMIC):NR<br>Development set(ChestX-ray14):NR<br>Development set(CheXpert):NR<br>Internal set:NR | Development set(JSRT):51.6<br>Development set(Montgomery):53.6<br>Development set(MIMIC):NR<br>Development set(ChestX-ray14):46<br>Development set(CheXpert):40.6<br>Internal set:46 | Development set(JSRT):58(13)<br>Development set(Montgomery):40(18)<br>Development set(MIMIC):NR<br>Development set(ChestX-ray14):46(16)<br>Development set(CheXpert):60(17)<br>Internal set:46(16) | Yes |
| [60] | Luo        | 20<br>22 | NR                                                                                                                                                                                                                                                                                                                                                                                                                                                                                                                                                                                                                                   | NR                             | NR                                                                                                                                                                                           | NR(1720images)                                                                                                                                                                 | 45                                                                                                                                                                                   | NR                                                                                                                                                                                                 | No  |
| [61] | Lin        | 20<br>20 | NR                                                                                                                                                                                                                                                                                                                                                                                                                                                                                                                                                                                                                                   | NR                             | NR                                                                                                                                                                                           | NR                                                                                                                                                                             | 44                                                                                                                                                                                   | Male:48(17),Female:46(15)                                                                                                                                                                          | Yes |
| [62] | Haq        | 20<br>21 | Keyword matching from PACS                                                                                                                                                                                                                                                                                                                                                                                                                                                                                                                                                                                                           | NR                             | Development set(ChestX-ray14):30805<br>Development set(CheXpert):65240<br>Internal set:30805                                                                                                 | Development set(ChestX-ray14):NR<br>Development set(CheXpert):NR<br>Internal set:NR                                                                                            | Development set(ChestX-ray14):46<br>Development set(CheXpert):40.6<br>Internal set:46                                                                                                | Development set(ChestX-ray14):46(16)<br>Development set(CheXpert):60(17)<br>Internal set:46(16)                                                                                                    | Yes |
| [63] | Wan<br>g   | 20<br>20 | NR                                                                                                                                                                                                                                                                                                                                                                                                                                                                                                                                                                                                                                   | NR                             | NR                                                                                                                                                                                           | Development set:NR(4483images)<br>Internal set:NR(1083images)                                                                                                                  | NR                                                                                                                                                                                   | NR                                                                                                                                                                                                 | No  |



Appendix Table S3: Deep learning characteristics

|      | First Author | Year | AI model                                                        | AI results: sensitivity, specificity<br>(%, 95% CI) | AI results: other metrics                                                                                                                                                                                                            |
|------|--------------|------|-----------------------------------------------------------------|-----------------------------------------------------|--------------------------------------------------------------------------------------------------------------------------------------------------------------------------------------------------------------------------------------|
| [1]  | Lee          | 2022 | DEEP:CHEST-XR-03                                                | 95.6(92.3-97.8),99.6(98.9-99.9)                     | AUROC:0.978(0.965-0.991)                                                                                                                                                                                                             |
| [2]  | Rudolph      | 2022 | CheXNet (DenseNet)                                              | 51,82                                               | AUC:0.723<br>Accuracy:79%<br>Positive predictive value:0.24<br>Negative predictive value:0.94                                                                                                                                        |
| [3]  | Park         | 2022 | ViT (supervised)<br>ViT (self-training)                         | NR                                                  | AUC:<br>Supervised:0.909<br>Proposed:0.913                                                                                                                                                                                           |
| [4]  | Shin         | 2022 | Lunit INSIGHT for Chest<br>Radiography, version 3<br>(ResNet34) | 98.5(92.0-99.9),99.6(99.3-99.8)                     | PPV:89.2%(80.5-94.3)<br>NPV:99.9%(99.7-99.9)<br>Accuracy:99.6(99.3-99.8)                                                                                                                                                             |
| [5]  | Hallinan     | 2022 | DenseNet121<br>ResNet50<br>EfficientNetB3                       | NR                                                  | AUC(NLP):<br>DenseNet121:0.839(0.831-0.847)<br>ResNet50: 0.838(0.830-0.846)<br>EfficientNetB3:0.869(0.863-0.876)<br>AUC(RD):<br>DenseNet121:0.880(0.873-0.887)<br>ResNet50: 0.881(0.873-0.887)<br>EfficientNetB3:(0.943(0.939-0.946) |
| [6]  | Gipson       | 2022 | Annalise CXR software, version<br>1.2                           | 39.2(31.8-46.9),99.8(99.4-100)                      | Cohen's κ:0.53(0.45-0.60)                                                                                                                                                                                                            |
| [7]  | Shamrat      | 2022 | LungNet22 (VGG-based)                                           |                                                     |                                                                                                                                                                                                                                      |
| [8]  | Hong         | 2022 | Lunit INSIGHT for Chest<br>Radiography, version 2.0             | 74.8(66.2-82.2),99.8(99-100)                        | Accuracy:95.3%(93.4-96.7)<br>Positive predictive value.:98.9(94.2-100)<br>Negative predictive value:94.7(92.5-96.4)                                                                                                                  |
| [9]  | Jin          | 2022 | Lunit INSIGHT for Chest<br>Radiography                          | NR                                                  | NR                                                                                                                                                                                                                                   |
| [10] | Kim          | 2022 | EfficientNetv2-M                                                |                                                     |                                                                                                                                                                                                                                      |
| [11] | Wang         | 2022 | SE-ResNext50<br>EfficientNet-B3                                 | 98.02,99.60                                         | Accuracy:99.25%<br>Dice:98.27%                                                                                                                                                                                                       |

|      |             |      |                                                                         |                                                                                               |                                                                                                                                                                                                                                        |
|------|-------------|------|-------------------------------------------------------------------------|-----------------------------------------------------------------------------------------------|----------------------------------------------------------------------------------------------------------------------------------------------------------------------------------------------------------------------------------------|
| [12] | Rudolph     | 2022 | FCOS (RetinaNet-based)                                                  | 89,95                                                                                         | AUC:0.957<br>Accuracy:94%<br>Positive predictive value:0.64<br>Negative predictive value:0.99                                                                                                                                          |
| [13] | Mangalmurti | 2022 | VGG16<br>VGG19                                                          | VGG16:47,NR<br>VGG19:46.6,NR                                                                  | Accuracy:<br>VGG16:78.2%<br>VGG19:78.2%<br>Precision:<br>VGG16:45.7%<br>VGG19:45.7%<br>F1-score:<br>VGG16:46.3%<br>VGG19:46.2%                                                                                                         |
| [14] | Kakkar      | 2022 | NR                                                                      | NR                                                                                            | NR                                                                                                                                                                                                                                     |
| [15] | Iqbal       | 2022 | VDV                                                                     | SIIM:85.17,NR<br>RS-NIH(Random):90.9,NR<br>RS-NIH(Patient wise):85.45,NR                      | AUC:<br>SIIM:0.86<br>RS-NIH(Random):0.95<br>RS-NIH(Patient wise):0.77<br>Accuracy:<br>SIIM:78.27%<br>RS-NIH(Random):82.68%<br>RS-NIH(Patient wise):69.12%                                                                              |
| [16] | Feng        | 2022 | DeepLabV3<br>EfficientNetB3                                             | DeepLabV3+ with Efficientnet-B3<br>:93,95<br>SIIM-ACR:81,86                                   | AUC:<br>DeepLabV3+ with Efficientnet-B3<br>:0.94<br>SIIM-ACR:0.83<br>Mean Dice:<br>DeepLabV3+ with Efficientnet-B3:0.91:<br>SIIM-ACR:0.69<br>TP-Dice:<br>DeepLabV3+ with Efficientnet-B3:0.69:<br>SIIM-ACR:0.50                        |
| [17] | Thian       | 2022 | ResNet50<br>DenseNet121<br>EfficientNetB2                               | ResNet50:71(67-76),100(99-100)<br>DenseNet121:66(61-70),93(91-96)<br>EfficientNetB2:86(82-89) | AUC:<br>ResNet50:0.95(0.93-0.97)<br>DenseNet121:0.93(0.91-0.96)<br>EfficientNetB2:0.98(0.96-0.99)                                                                                                                                      |
| [18] | Lee         | 2022 | ECCG12Net                                                               | NR                                                                                            | Kappa:0.806                                                                                                                                                                                                                            |
| [19] | Tian        | 2022 | ResNet<br>InceptionV3<br>DenseNet<br>VGG<br>NASNet<br>InceptionResNetV2 | SAHZUSM(Private):94.4,93.2<br>NIH(Public):38.4,86.2                                           | Accuracy:<br>SAHZUSM(Private):93.8%<br>NIH(Public):62.3%<br>AUC:<br>SAHZUSM(Private):0.982<br>NIH(Public):0.641<br>Precision:<br>SAHZUSM(Private):93.3%<br>NIH(Public):73.9%<br>F1-score:<br>SAHZUSM(Private):93.9<br>NIH(Public):45.0 |

|      |          |      |                                                                 |                                                                                                                                                                                                     |                                                                                                                                                                                                                                                                                       |
|------|----------|------|-----------------------------------------------------------------|-----------------------------------------------------------------------------------------------------------------------------------------------------------------------------------------------------|---------------------------------------------------------------------------------------------------------------------------------------------------------------------------------------------------------------------------------------------------------------------------------------|
| [20] | Seah     | 2021 | Annalise CXR V.1.2                                              | NR                                                                                                                                                                                                  | AUC:<br>Simple:0.981(0.976-0.986)<br>Tension:0.997(0.995-0.999)                                                                                                                                                                                                                       |
| [21] | Kuo      | 2021 | Model-ORIG<br>Model-RECA                                        | NR                                                                                                                                                                                                  | AUC:<br>Model-ORIG:0.78<br>Model-RECA:0.84                                                                                                                                                                                                                                            |
| [22] | Hong     | 2021 | EfficientNet B7-based                                           | 96.70,99.03                                                                                                                                                                                         | Accuracy:98.45%                                                                                                                                                                                                                                                                       |
| [23] | Rueckel  | 2021 | Algorithm 2 (DenseNet-based)                                    | NR                                                                                                                                                                                                  | AUC:<br>Unilateral:0.877(0.861-0.893)<br>Bilateral:0.923(0.889-0.957)                                                                                                                                                                                                                 |
| [24] | Cho      | 2021 | ResNet50                                                        | AMC:90.50,84.62<br>SNUBH:98.89,84.57                                                                                                                                                                | AUC:<br>AMC:0.8756<br>SNUBH:0.9173<br>Accuracy:<br>AMC:90.30%<br>SNUBH:96.41%<br>PPV:<br>AMC:99.40%<br>SNUBH:96.83%<br>NPV:<br>AMC:24.12%<br>SNUBH:94.08%                                                                                                                             |
| [25] | Niehues  | 2021 | ResNet51                                                        | NR                                                                                                                                                                                                  | AUC:0.776                                                                                                                                                                                                                                                                             |
| [26] | Kao      | 2021 | Unet (ResNet34)                                                 | 83.7(74.2-90.8),99.1(98.7-99.4)                                                                                                                                                                     | PPV (Precision):68.6%(60.5-75.6)<br>NPV:99.6%(99.4-99.8)<br>Accuracy:98.7%(98.3-99.1)<br>AUC:0.914(0.905-0.923)<br>F1 score:0.754(0.740-0.768)                                                                                                                                        |
| [27] | Mosquera | 2021 | Albunet                                                         | 81.71(75.22-87.39),98.4(97.66-99.05)                                                                                                                                                                | PPV:86.51%(80.80-91.80)<br>NPV:97.72%(96.84-98.52)                                                                                                                                                                                                                                    |
| [28] | Wang     | 2021 | ChestNet                                                        | NR                                                                                                                                                                                                  | Accuracy:94.51%<br>AUC:0.9906                                                                                                                                                                                                                                                         |
| [29] | Nam      | 2021 | DLAD-10 (ResNet34)                                              | 100,98.2                                                                                                                                                                                            | NR                                                                                                                                                                                                                                                                                    |
| [30] | Choi     | 2021 | Lunit INSIGHT for Chest Radiography                             | 97.26(95.21-99.31),92.86(89.63-96.09)                                                                                                                                                               | AUC:0.9935(0.9868-1.0000)<br>Positive rate:95.3%(92.65-97.96)<br>Negative rate:92.86%(89.63-96.09)<br>Accuracy:95.49%(92.89-98.10)                                                                                                                                                    |
| [31] | Lyu      | 2021 | Dr. Wise Lung Analyzer (Faster RCNN)                            | 93.1(78.0-98.1),99.7(98.4-99.9)                                                                                                                                                                     | Accuracy:99.3%(97.9-99.8)                                                                                                                                                                                                                                                             |
| [32] | Kim      | 2021 | Lunit INSIGHT for Chest Radiography, version 2.5.7.4 (ResNet34) | HospitalA:81(75-86),90(87-93)<br>HospitalB:84(77-90),98(96-99)<br>HospitalC:85(80-92),77(75-80)<br>HospitalD:98(95-100),92(89-95)<br>HospitalE:92(87-97),92(89-94)<br>HospitalF:89(83-95),79(75-84) | PPV:<br>HospitalA:84%(78-89)<br>HospitalB:93%(88-97)<br>HospitalC:35%(30-40)<br>HospitalD:80%(73-86)<br>HospitalE:77%(69-84)<br>HospitalF:60%(53-67)<br>NPV:<br>HospitalA:88%(84-91)<br>HospitalB:94%(92-97)<br>HospitalC:97%(96-98)<br>HospitalD:99%(98-100)<br>HospitalE:98%(96-99) |

---

|      |          |      |                                                       |                                                                                                                         |                                                                                                                                                                                   |
|------|----------|------|-------------------------------------------------------|-------------------------------------------------------------------------------------------------------------------------|-----------------------------------------------------------------------------------------------------------------------------------------------------------------------------------|
|      |          |      |                                                       |                                                                                                                         | HospitalF:95%(93-98)<br>F1 score:<br>HospitalA:82%(78-86)<br>HospitalB:88%(83-92)<br>HospitalC:50%(44-55)<br>HospitalD:88%(83-92)<br>HospitalE:84%(78-89)<br>HospitalF:72%(66-77) |
| [33] | Li       | 2021 | LACNN                                                 | 80.4(78.3-82.5),93.2(90.7-95.7)                                                                                         | F1:0.807(0.764-0.850)<br>AUC:0.914(0.886-0.942)                                                                                                                                   |
| [34] | Thian    | 2021 | EfficientNetB3                                        |                                                                                                                         |                                                                                                                                                                                   |
| [35] | Abedalla | 2021 | Ens4B-UNet                                            | NR                                                                                                                      | Accuracy:99.81%<br>Recall:56.94,Precision:71.19<br>F-measure:633.27                                                                                                               |
| [36] | Sung     | 2021 | Med-Chest X-Ray system<br>(version 1.0.0, VUNO)       | 87.7(80-93),99.1(95-100)                                                                                                | JAFROC FOM:0.96(0.94-0.99)<br>AUC:0.98(0.96-1.00)                                                                                                                                 |
| [37] | Draelos  | 2021 | CT-NET                                                | NR                                                                                                                      | AUC:0.904<br>Average Precision:35.5%                                                                                                                                              |
| [38] | Wang     | 2021 | A3 Net                                                | NR                                                                                                                      | AUC:0.878                                                                                                                                                                         |
| [39] | Rueckel  | 2020 | AI_CheXNet<br>AI_1.5                                  | NR                                                                                                                      | AUC:<br>AI_CheXNet:0.765<br>AI_1.5:0.704                                                                                                                                          |
| [40] | Chen     | 2020 | YOLOv3 + DenseNet/ResNet                              | Original images: 80.95(66.00-<br>91.11),97.26(92.12-100.00)<br>Cropped images:90.48(90.26-<br>98.92),96.47(89.22-98.86) | Accuracy:<br>Original images: 92.25(85.29-95.35),<br>Cropped images: 94.49(88.18-96.85)                                                                                           |
| [41] | Röhrich  | 2020 | Unet                                                  | 91.6,99.9                                                                                                               | AUC:0.976<br>Precision:0.886<br>Recall:0.880<br>DSC:0.883<br>Average precision::0.954                                                                                             |
| [42] | Wang     | 2020 | CheXLocNet (Mask R-CNN<br>base)                       | 78(73-83),78(76-81)                                                                                                     | AUC:0.87<br>F1:0.60<br>PPV:49%(45-54)                                                                                                                                             |
| [43] | Yi       | 2020 | ResNet152                                             | 85(79-90),67(62-71)                                                                                                     | AUC:0.84(0.81-0.88)                                                                                                                                                               |
| [44] | Hwang    | 2020 | Lunit INSIGHT for Chest<br>Radiography, version 4.7.2 | 70.2(65.0-75.5),97.7(96.9-98.5)                                                                                         | Positive predictive value:87.2%(83.0-91.5)<br>Negative predictive value:93.7%(92.5-95.0)                                                                                          |
| [45] | Kitamura | 2020 | The algorithm by Li                                   | 77,93                                                                                                                   | AUC:0.90                                                                                                                                                                          |
| [46] | Park     | 2020 | NR                                                    | NR                                                                                                                      | FOM:1.0                                                                                                                                                                           |
| [47] | Wang     | 2020 | Thorax-Net                                            | NR                                                                                                                      | AUC:<br>Patient wise:0.8254<br>Image wise:0.941                                                                                                                                   |

---

|      |           |      |                                           |                                                                                                              |                                                                                                                                                                                                        |
|------|-----------|------|-------------------------------------------|--------------------------------------------------------------------------------------------------------------|--------------------------------------------------------------------------------------------------------------------------------------------------------------------------------------------------------|
| [48] | Elkins    | 2020 | DenseNet121                               | NR                                                                                                           | AUC:0.83<br>Precision:0.17                                                                                                                                                                             |
|      |           |      |                                           |                                                                                                              | Precision:<br>AI-one:80.3%<br>AI-two:84.5%<br>Positive prediction:<br>AI-one:80.3%<br>AI-two:84.5%                                                                                                     |
| [49] | Lai       | 2020 | AI-one<br>AI-two                          | AI-one:33.04,61.74<br>AI-two:46.09,71.30                                                                     | AUC:<br>AI-one:0.89<br>AI-two:0.91<br>AUC(prediction):<br>AI-one:0.50(0.45-0.57)<br>AI-two:0.62(0.56-0.69)<br>Mean of the change in probability:19.7%(9.7-29.7)                                        |
| [50] | Majkowska | 2020 | Xception                                  | CXR14:72.8(64.1-81.0),90.8(88.9-93.1)<br>DS1:64.8(47.7-78.4),99.7(99.3-100)                                  | Positive predictive value:<br>CXR14:48.7%(43.8-55.8)<br>DS1:90.0%(78.9-100)                                                                                                                            |
| [51] | Li        | 2019 | CNN (segmentation) + SVM (classification) | 100,82.5                                                                                                     | Accuracy:94%<br><br>PPV:<br>3-h follow-up:65.7%<br>1-day follow-up:74.8%<br>NPV:<br>3-h follow-up:91.6%<br>1-day follow-up:89.4%                                                                       |
| [52] | Park      | 2019 | YOLO9000 (Darknet19)                      | Model:89,7,96.4<br>3-h follow-up:61.1,93.0<br>1-day follow-up:63.4,93.5                                      | AUC:<br>Model:0.984<br>3-h follow-up:0.898<br>1-day follow-up:0.905<br>Accuracy:<br>3-h follow-up:87.3%<br>1-day follow-up:86.5%                                                                       |
| [53] | Liang     | 2019 | DenseNet121 (Unet-implemented)            | NR                                                                                                           | AUC:0.869                                                                                                                                                                                              |
| [54] | Hwang     | 2019 | DenseNet                                  | NR                                                                                                           | AUC:<br>InstitutionA:0.833(0.626-0.953)<br>InstitutionB:1.000(0.884-1.000)<br>InstitutionC:1.000(0.863-1.000)<br>InstitutionD:1.000(0.832-1.000)<br>InstitutionE:0.850(0.621-0.968)                    |
| [55] | Taylor    | 2018 | VGG19<br>Inception                        | High sensitivity model(Internal):84(78-90),90(89-92)<br>High specificity model(Internal):80(72-86),97(96-98) | AUC:<br>High sensitivity model(Internal):0.94<br>High specificity model(Internal):0.96<br>PPV:<br>High sensitivity model(Internal):0.45(0.39-0.51)<br>High specificity model(Internal):0.71(0.63-0.77) |
| [56] | Rajpurkar | 2018 | CheXNeXt (DenseNet)                       | 88.9(78.8-97.5),89.1(85.8-92.1)                                                                              | AUC:0.944(0.915-0.969)                                                                                                                                                                                 |
| [57] | Cicero    | 2017 | Inception                                 | 78,78                                                                                                        | AUC:0.861<br>Accuracy:78<br>PPV:49                                                                                                                                                                     |

---

|      |      |      |                                                     |             |                                                                                                                                                                                                                                                                                                                                                                                                                                                                                                                                              |
|------|------|------|-----------------------------------------------------|-------------|----------------------------------------------------------------------------------------------------------------------------------------------------------------------------------------------------------------------------------------------------------------------------------------------------------------------------------------------------------------------------------------------------------------------------------------------------------------------------------------------------------------------------------------------|
|      |      |      |                                                     |             | NPV:95                                                                                                                                                                                                                                                                                                                                                                                                                                                                                                                                       |
| [58] | Chen | 2019 | DenseNet169<br>DenseNet121<br>ResNet101<br>ResNet50 | NR          | AUN:0.893                                                                                                                                                                                                                                                                                                                                                                                                                                                                                                                                    |
| [59] | Zhou | 2021 | NR                                                  | NR          | AUC:0.8472                                                                                                                                                                                                                                                                                                                                                                                                                                                                                                                                   |
|      |      |      |                                                     |             | AUC:<br>Private dataset:0.975<br>Image level annotation:0.977<br>Frontal image+Lateral image:0.979<br>Accuracy:<br>Private dataset:0.943<br>Image level annotation:0.944<br>Frontal image+Lateral image:0.948<br>Precision:<br>Private dataset:0.951<br>Image level annotation:0.932<br>Frontal image+Lateral image:0.925<br>Recall:<br>Private dataset:0.873<br>Image level annotation:0.897<br>Frontal image+Lateral image:0.908<br>F1-score<br>Private dataset:0.910<br>Image level annotation:0.914<br>Frontal image+Lateral image:0.916 |
| [60] | Luo  | 2022 | Fusion model                                        | NR          | Recall:99.66%<br>Precision:87.78%<br>Accuracy:88.88%<br>F1 score:0.9334                                                                                                                                                                                                                                                                                                                                                                                                                                                                      |
| [61] | Lin  | 2020 | NR                                                  | NR          | AUC:<br>With the NIH dataset:LR0.76,HR0.83<br>With the Stanford dataset:LR0.80,HR0.90                                                                                                                                                                                                                                                                                                                                                                                                                                                        |
| [62] | Haq  | 2021 | NR                                                  | NR          | Accuracy:93.45%<br>PPV:97.86%<br>NPV:89.94%<br>F1-score:92.97%                                                                                                                                                                                                                                                                                                                                                                                                                                                                               |
| [63] | Wang | 2020 | MS_ScSE_DenseNet                                    | 88.55,98.14 |                                                                                                                                                                                                                                                                                                                                                                                                                                                                                                                                              |

---

Appendix Table S4: Physicians characteristics

|      | First Author | Year | Physician results: sensitivity, specificity<br>(%, 95% CI)     | Physician results: other metrics                                                                                                               |
|------|--------------|------|----------------------------------------------------------------|------------------------------------------------------------------------------------------------------------------------------------------------|
| [1]  | Lee          | 2022 | 94.3(91.4-96.4),99.5(99.1-99.7)                                | Accuracy :98.8%(98.3-99.1)<br><br>AUC:<br>Radiology residents[RR]:0.981<br>Non-radiology residents[NRR]:0.856<br>Accuracy:<br>RR99%<br>NRR:94% |
| [2]  | Rudolph      | 2022 | Radiology residents:96,99<br>Non-radiology residents:73,96     | Positive predictive value:<br>RR:0.90<br>NRR:0.68<br>Negative predictive value:<br>RR:1.00<br>NRR:0.97                                         |
| [6]  | Gipson       | 2022 | 33.1(26.2-40.7),99.4(98.7-99.7)                                | Cohen's κ:0.44(0.36-0.52)<br><br>Accuracy:92.3%(90.3-94.3)                                                                                     |
| [8]  | Hong         | 2022 | 67.1(59.6-74.6),99.6(99.1-100)                                 | Positive predictive value:98.1(95.4-100)<br>Negative predictive value:91.3(88.9-93.6)                                                          |
| [9]  | Jin          | 2022 | NR                                                             | NR<br><br>AUC:<br>Radiology residents[RR]:0.981<br>Non-radiology residents[NRR]:0.856<br>Accuracy:<br>RR:99%<br>NRR94%                         |
| [12] | Rudolph      | 2022 | Radiology residents:86,99<br>Non-radiology residents:73,96     | Positive predictive value:<br>RR:0.90<br>NRR:0.68<br>Negative predictive value:<br>RR:1.00<br>NRR:0.97                                         |
| [18] | Lee          | 2022 | NR                                                             | CV-V8,ER-V15,ER-V6<br>Kappa:0.110,0.067,0.052<br><br>PPV (Precision):1.000(1.000-1.000)<br>NPV:0.983(0.981-0.985)                              |
| [26] | Kao          | 2021 | 25.6(16.8-36.1),100 (99.9-100)                                 | Accuracy:0.983(0.978-0.987)<br>AUC:0.628(0.612-0.643)<br>F1 score:0.407(0.391-0.423)                                                           |
| [29] | Nam          | 2021 | 91.3,99.6                                                      | NR<br><br>AUC:0.8679(0.8507-0.8850)                                                                                                            |
| [30] | Choi         | 2021 | 82.53(80.58-84.48),81.97(80.00-83.95)                          | Positive rate:87.14(85.42-88.85)<br>Negative rate:76.03(73.83-78.22)<br>Accuracy:82.30(80.35-84.26)                                            |
| [33] | Li           | 2021 | 61.9(56.2-67.6),96.1(93.3-98.9)                                | F1:0.681(0.518-0.844)<br>AUC:0.912(0.885-0.939)                                                                                                |
| [36] | Sung         | 2021 | 88(57-99),NR                                                   | JAFROC FOM:0.92(0.83-1.01)                                                                                                                     |
| [43] | Yi           | 2020 | Resident1:91(86-95),67(62-71)<br>Resident2:89(84-93),73(69-78) | AUC:<br>Resident1:0.94(0.92-0.96)<br>Resident2:0.91(0.88-0.94)                                                                                 |

---

|      |           |      |                                                                                                          |                                                                                         |
|------|-----------|------|----------------------------------------------------------------------------------------------------------|-----------------------------------------------------------------------------------------|
| [44] | Hwang     | 2020 | 55.5(49.8-61.2),99.8(99.6-100)                                                                           | Positive predictive value:98.8%(97.1-100)<br>Negative predictive value:91.1%(89.6-92.6) |
| [46] | Park      | 2020 | NR                                                                                                       | NR                                                                                      |
| [50] | Majkowska | 2020 | CXR14:79.2(75.5-83.0),92.8(92.0-93.7)<br>DS1:51.7(43.2-60.2),99.5(99.3-99.7)                             | Positive predictive value:<br>CXR14:54.8%(51.8-58.2)<br>DS1:83.5%(77.5-89.4)            |
| [51] | Li        | 2019 | Three test radiologists sensitivity:91.3,95.6,86.3<br>Three test radiologists specificity:90.0,90.0,85.0 | Accuracy:<br>Three test radiologists:91.0%,94.5%,86.0%                                  |
| [54] | Hwang     | 2019 | NR                                                                                                       | NR                                                                                      |
| [56] | Rajpurkar | 2018 | Resident radiologists:65.9(57.9-74.0),97.2(96.3-98.2)<br>BC radiologists:61.5(55.9-67.3),97.1(96.4-97.8) | AUC:0.940(0.912-0.962)                                                                  |

---



## References

1. Lee SY, Ha S, Jeon MG, et al. Localization-adjusted diagnostic performance and assistance effect of a computer-aided detection system for pneumothorax and consolidation. *npj Digital Medicine*, 2022; 5(1): 107.
2. Rudolph J, Schachtner B, Fink N, et al. Clinically focused multi-cohort benchmarking as a tool for external validation of artificial intelligence algorithm performance in basic chest radiography analysis. *Sci Rep*, 2022; 12(1): 12764.
3. Park S, Kim G, Oh Y, et al. Self-evolving vision transformer for chest X-ray diagnosis through knowledge distillation. *Nat Commun*, 2022; 13(1): 3848.
4. Shin HJ, Son NH, Kim MJ, et al. Diagnostic performance of artificial intelligence approved for adults for the interpretation of pediatric chest radiographs. *Sci Rep*, 2022; 12(1): 10215.
5. Hallinan J, Feng M, Ng D, et al. Detection of Pneumothorax with Deep Learning Models: Learning From Radiologist Labels vs Natural Language Processing Model Generated Labels. *Acad Radiol*, 2022; 29(9): 1350-1358.
6. Gipson J, Tang V, Seah J, et al. Diagnostic accuracy of a commercially available deep-learning algorithm in supine chest radiographs following trauma. *Br J Radiol*, 2022; 95(1134): 20210979.
7. Shamrat F, Azam S, Karim A, et al. LungNet22: A Fine-Tuned Model for Multiclass Classification and Prediction of Lung Disease Using X-ray Images. *J Pers Med*, 2022; 12(5).
8. Hong W, Hwang EJ, Lee JH, et al. Deep Learning for Detecting Pneumothorax on Chest Radiographs after Needle Biopsy: Clinical Implementation. *Radiology*, 2022; 303(2): 433-441.
9. Jin KN, Kim EY, Kim YJ, et al. Diagnostic effect of artificial intelligence solution for referable thoracic abnormalities on chest radiography: a multicenter respiratory outpatient diagnostic cohort study. *Eur Radiol*, 2022; 32(5): 3469-3479.
10. Kim S, Rim B, Choi S, et al. Deep Learning in Multi-Class Lung Diseases' Classification on Chest X-ray Images. *Diagnostics (Basel)*, 2022; 12(4).
11. Wang X, Yang S, Lan J, et al. Automatic Segmentation of Pneumothorax in Chest Radiographs Based on a Two-Stage Deep Learning Method. *IEEE Transactions on Cognitive and Developmental Systems*, 2022; 14(1): 205-218.

12. Rudolph J, Huemmer C, Ghesu FC, et al. Artificial Intelligence in Chest Radiography Reporting Accuracy: Added Clinical Value in the Emergency Unit Setting Without 24/7 Radiology Coverage. *Invest Radiol*, 2022; 57(2): 90-98.
13. Mangalmurti Y, Wattanapongsakorn N. Practical Machine Learning Techniques for COVID-19 Detection Using Chest. *Intelligent Automation and Soft Computing*, 2022: 733-752.
14. Kakkar B, Johri P, Kumar Y, et al. An IoMT-Based Federated and Deep Transfer Learning Approach to the Detection of Diverse Chest Diseases Using Chest X-Rays. *HUMAN-CENTRIC COMPUTING AND INFORMATION SCIENCES*, 2022; 12.
15. Iqbal T, Shaukat A, Akram MU, et al. A Hybrid VDV Model for Automatic Diagnosis of Pneumothorax Using Class-Imbalanced Chest X-Rays Dataset. *IEEE Access*, 2022; 10: 27670-27683.
16. Feng S, Liu Q, Patel A, et al. Automated pneumothorax triaging in chest X-rays in the New Zealand population using deep-learning algorithms. *J Med Imaging Radiat Oncol*, 2022.
17. Thian YL, Ng DW, Hallinan J, et al. Effect of Training Data Volume on Performance of Convolutional Neural Network Pneumothorax Classifiers. *J Digit Imaging*, 2022; 35(4): 881-892.
18. Lee CC, Lin CS, Tsai CS, et al. A deep learning-based system capable of detecting pneumothorax via electrocardiogram. *Eur J Trauma Emerg Surg*, 2022; 48(4): 3317-3326.
19. Tian Y, Wang J, Yang W, et al. Deep multi-instance transfer learning for pneumothorax classification in chest X-ray images. *Med Phys*, 2022; 49(1): 231-243.
20. Seah J, Tang C, Buchlak QD, et al. Do comprehensive deep learning algorithms suffer from hidden stratification? A retrospective study on pneumothorax detection in chest radiography. *BMJ Open*, 2021; 11(12): e053024.
21. Kuo PC, Tsai CC, López DM, et al. Recalibration of deep learning models for abnormality detection in smartphone-captured chest radiograph. *NPJ Digit Med*, 2021; 4(1): 25.
22. Hong M, Rim B, Lee H, et al. Multi-Class Classification of Lung Diseases Using CNN Models. *Applied Sciences*, 2021; 11(19): 9289.
23. Rueckel J, Huemmer C, Fieselmann A, et al. Pneumothorax detection in chest radiographs: optimizing artificial intelligence system for accuracy and confounding bias reduction using in-image annotations in algorithm training. *Eur Radiol*, 2021; 31(10): 7888-7900.

24. Cho Y, Park B, Lee SM, et al. Optimal number of strong labels for curriculum learning with convolutional neural network to classify pulmonary abnormalities in chest radiographs. *Comput Biol Med*, 2021; 136: 104750.
25. Niehues SM, Adams LC, Gaudin RA, et al. Deep-Learning-Based Diagnosis of Bedside Chest X-ray in Intensive Care and Emergency Medicine. *Invest Radiol*, 2021; 56(8): 525-534.
26. Kao CY, Lin CY, Chao CC, et al. Automated Radiology Alert System for Pneumothorax Detection on Chest Radiographs Improves Efficiency and Diagnostic Performance. *Diagnostics (Basel)*, 2021; 11(7).
27. Mosquera C, Diaz FN, Binder F, et al. Chest x-ray automated triage: A semiologic approach designed for clinical implementation, exploiting different types of labels through a combination of four Deep Learning architectures. *Comput Methods Programs Biomed*, 2021; 206: 106130.
28. Wang Y, Sun L, Jin Q. Enhanced Diagnosis of Pneumothorax with an Improved Real-Time Augmentation for Imbalanced Chest X-rays Data Based on DCNN. *IEEE/ACM Trans Comput Biol Bioinform*, 2021; 18(3): 951-962.
29. Nam JG, Kim M, Park J, et al. Development and validation of a deep learning algorithm detecting 10 common abnormalities on chest radiographs. *Eur Respir J*, 2021; 57(5).
30. Choi SY, Park S, Kim M, et al. Evaluation of a deep learning-based computer-aided detection algorithm on chest radiographs: Case-control study. *Medicine (Baltimore)*, 2021; 100(16): e25663.
31. Lyu W, Xia F, Zhou C, et al. Application of deep learning-based chest CT auxiliary diagnosis system in emergency trauma patients. *Zhonghua yi xue za zhi*, 2021; 101(7): 481-486.
32. Kim EY, Kim YJ, Choi WJ, et al. Performance of a deep-learning algorithm for referable thoracic abnormalities on chest radiographs: A multicenter study of a health screening cohort. *PLoS One*, 2021; 16(2): e0246472.
33. Li F, Shi JX, Yan L, et al. Lesion-aware convolutional neural network for chest radiograph classification. *Clin Radiol*, 2021; 76(2): 155.e151-155.e114.
34. Thian YL, Ng D, Hallinan J, et al. Deep Learning Systems for Pneumothorax Detection on Chest Radiographs: A Multicenter External Validation Study. *Radiol Artif Intell*, 2021; 3(4): e200190.
35. Abedalla A, Abdullah M, Al-Ayyoub M, et al. Chest X-ray pneumothorax segmentation using U-Net with EfficientNet and ResNet architectures. *PeerJ Comput Sci*, 2021; 7: e607.

36. Sung J, Park S, Lee SM, et al. Added Value of Deep Learning-based Detection System for Multiple Major Findings on Chest Radiographs: A Randomized Crossover Study. *Radiology*, 2021; 299(2): 450-459.
37. Draelos RL, Dov D, Mazurowski MA, et al. Machine-learning-based multiple abnormality prediction with large-scale chest computed tomography volumes. *Med Image Anal*, 2021; 67: 101857.
38. Wang H, Wang S, Qin Z, et al. Triple attention learning for classification of 14 thoracic diseases using chest radiography. *Med Image Anal*, 2021; 67: 101846.
39. Rueckel J, Trappmann L, Schachtner B, et al. Impact of Confounding Thoracic Tubes and Pleural Dehiscence Extent on Artificial Intelligence Pneumothorax Detection in Chest Radiographs. *Invest Radiol*, 2020; 55(12): 792-798.
40. Chen KC, Yu HR, Chen WS, et al. Diagnosis of common pulmonary diseases in children by X-ray images and deep learning. *Sci Rep*, 2020; 10(1): 17374.
41. Röhrich S, Schlegl T, Bardach C, et al. Deep learning detection and quantification of pneumothorax in heterogeneous routine chest computed tomography. *Eur Radiol Exp*, 2020; 4(1): 26.
42. Wang H, Gu H, Qin P, et al. CheXLocNet: Automatic localization of pneumothorax in chest radiographs using deep convolutional neural networks. *PLoS One*, 2020; 15(11): e0242013.
43. Yi PH, Kim TK, Yu AC, et al. Can AI outperform a junior resident? Comparison of deep neural network to first-year radiology residents for identification of pneumothorax. *Emerg Radiol*, 2020; 27(4): 367-375.
44. Hwang EJ, Hong JH, Lee KH, et al. Deep learning algorithm for surveillance of pneumothorax after lung biopsy: a multicenter diagnostic cohort study. *Eur Radiol*, 2020; 30(7): 3660-3671.
45. Kitamura G, Deible C. Retraining an open-source pneumothorax detecting machine learning algorithm for improved performance to medical images. *Clin Imaging*, 2020; 61: 15-19.
46. Park S, Lee SM, Lee KH, et al. Deep learning-based detection system for multiclass lesions on chest radiographs: comparison with observer readings. *Eur Radiol*, 2020; 30(3): 1359-1368.
47. Wang H, Jia H, Lu L, et al. Thorax-Net: An Attention Regularized Deep Neural Network for Classification of Thoracic Diseases on Chest Radiography. *IEEE J Biomed Health Inform*, 2020; 24(2): 475-485.
48. Elkins A, Freitas FF, Sanz V. Developing an app to interpret chest X-rays to support the diagnosis of respiratory pathology with artificial intelligence. *Journal of Medical Artificial Intelligence*, 2020; 3.

49. Lai KHA, Ma SK. Sensitivity and specificity of artificial intelligence with Microsoft Azure in detecting pneumothorax in emergency department: A pilot study. *Hong Kong Journal of Emergency Medicine*, 2020; 0(0): 1024907920948994.
50. Majkowska A, Mittal S, Steiner DF, et al. Chest Radiograph Interpretation with Deep Learning Models: Assessment with Radiologist-adjudicated Reference Standards and Population-adjusted Evaluation. *Radiology*, 2020; 294(2): 421-431.
51. Li X, Thrall JH, Digumarthy SR, et al. Deep learning-enabled system for rapid pneumothorax screening on chest CT. *Eur J Radiol*, 2019; 120: 108692.
52. Park S, Lee SM, Kim N, et al. Application of deep learning-based computer-aided detection system: detecting pneumothorax on chest radiograph after biopsy. *Eur Radiol*, 2019; 29(10): 5341-5348.
53. Liang X, Peng C, Qiu B, et al. Dense networks with relative location awareness for thorax disease identification. *Med Phys*, 2019; 46(5): 2064-2073.
54. Hwang EJ, Park S, Jin KN, et al. Development and Validation of a Deep Learning-Based Automated Detection Algorithm for Major Thoracic Diseases on Chest Radiographs. *JAMA Netw Open*, 2019; 2(3): e191095.
55. Taylor AG, Mielke C, Mongan J. Automated detection of moderate and large pneumothorax on frontal chest X-rays using deep convolutional neural networks: A retrospective study. *PLoS Med*, 2018; 15(11): e1002697.
56. Rajpurkar P, Irvin J, Ball RL, et al. Deep learning for chest radiograph diagnosis: A retrospective comparison of the CheXNeXt algorithm to practicing radiologists. *PLoS Med*, 2018; 15(11): e1002686.
57. Cicero M, Bilbily A, Colak E, et al. Training and Validating a Deep Convolutional Neural Network for Computer-Aided Detection and Classification of Abnormalities on Frontal Chest Radiographs. *Invest Radiol*, 2017; 52(5): 281-287.
58. Chen B, Li J, Guo X, et al. DualCheXNet: dual asymmetric feature learning for thoracic disease classification in chest X-rays. *Biomedical Signal Processing and Control*, 2019; 53: 101554.
59. Zhou Y, Zhou T, Zhou T, et al. Contrast-Attentive Thoracic Disease Recognition With Dual-Weighting Graph Reasoning. *IEEE Trans Med Imaging*, 2021; 40(4): 1196-1206.

60. Luo JX, Liu WF, Yu L. Pneumothorax Recognition Neural Network Based on Feature Fusion of Frontal and Lateral Chest X-Ray Images. *IEEE Access*, 2022; 10: 53175-53187.
61. Lin CH, Wu JX, Li CM, et al. Enhancement of Chest X-Ray Images to Improve Screening Accuracy Rate Using Iterated Function System and Multilayer Fractional-Order Machine Learning Classifier. *IEEE Photonics Journal*, 2020; 12(4): 1-18.
62. Haq NF, Moradi M, Wang ZJ. A deep community based approach for large scale content based X-ray image retrieval. *Med Image Anal*, 2021; 68: 101847.
63. Wang Q, Liu Q, Luo G, et al. Automated segmentation and diagnosis of pneumothorax on chest X-rays with fully convolutional multi-scale ScSE-DenseNet: a retrospective study. *BMC Med Inform Decis Mak*, 2020; 20(Suppl 14): 317.
